# Supplementary material
Source: Springer Nature journal article supplement (https://www.springermedizin.de/resource/supplementary/13012_2008_139_MOESM3_ESM.pdf/9629462)
Supplement: MOESM3 [file 9629462]

Assessed for eligibility (n= 980)  
947 by phone  
33 onsite

**Enrollment**  
September 2003-August 2005

Randomized (n=279)

Excluded (n=701 )  
  
Not meeting inclusion criteria  
(n=375)  
Refused to participate  
(n= 43)  
Other reasons  
(n=283)  
266 willing to participate but did not  
show up for enrollment  
17 willingness unknown

Allocated to intensive intervention  
(n= 140)  
Received allocated intervention  
(n= 136)  
Did not receive allocated intervention  
(n= 4)  
1 adverse event at the baseline visit  
3 miscommunication with study staff

**Allocation**

Allocated to minimal intervention  
(n= 139)  
Received allocated intervention  
(n= 139)  
Did not receive allocated intervention  
(n= 0)

3-mo Lost to follow-up (n=50)  
10 dropouts  
40 unable to contact/schedule/no shows  
12-mo Lost to follow-up (n=27)  
Dropouts (12), Deceased (2), Unable to  
contact/schedule (4), No shows (9)  
Discontinued intervention (11 Withdrew)  
No phone follow-up (18); 1 phone  
(23); 2 phone (18); 3 phone (15); 4 phone  
(27); 5 phone (39)

**Follow-Up**  
February 2004 - January 2007

3-mo Lost to follow-up (n= 44)  
4 dropouts  
40 unable to contact or schedule  
12-mo Lost to follow-up (n=21)  
Dropouts (8), Deceased (3), Unable  
to contact/schedule (4), No shows (6)  
Discontinued intervention  
(n= 0)
